1  
2  
3  
4  
5  
6  
7  
8  
9  
10  
11  
12  
13  
14  
15  
16  
17  
18  
19  
20  
21  
22  
23  
24  
25  
26  
27  
28  
29  
30  
31

Targetron-assisted delivery of exogenous DNA sequences  
into *Pseudomonas putida* through CRISPR-aided counterselection

by

Elena Velázquez<sup>1</sup>, Yamal Al-Ramahi<sup>1</sup>, Jonathan Tellechea<sup>2</sup>, Natalio Krasnogor<sup>2</sup> and Víctor de Lorenzo<sup>1\*</sup>

<sup>1</sup> *Systems and Synthetic Biology Department, Centro Nacional de Biotecnología (CNB-CSIC), Campus de Cantoblanco, Madrid 28049, Spain.* <sup>2</sup> *Interdisciplinary Computing and Complex Biosystems (ICOS) Research Group, Newcastle University, Newcastle Upon Tyne NE4 5TG, U.K.*

**Running Title:** Targetron technology for *P. putida*

**Keywords:** *Pseudomonas putida*, Targetron, genome editing, CRISPR/Cas9, barcode, orthogonal DNA

---

\* Corresponding Author: Víctor de Lorenzo  
Centro Nacional de Biotecnología-CSIC  
Campus de Cantoblanco, Madrid 28049, Spain  
Tel: 34- 91 585 45 36; Fax: 34-91 585 45 06  
E-mail: [vdlorenzo@cnb.csic.es](mailto:vdlorenzo@cnb.csic.es)

---

1 ABSTRACT

2

3 Genome editing methods based on Group II introns (known as Targetron technology) have been long  
4 used as a gene knock-out strategy in a wide range of organisms in a fashion independent of homologous  
5 recombination. Yet, their utility as delivery systems has been typically suboptimal because of their  
6 reduced efficiency of insertion when they carry exogenous sequences. We show that this limitation can  
7 be tackled and Targetron adapted as a general tool in Gram-negative bacteria. To this end, a set of  
8 broad host range standardized vectors were designed for conditional expression of the LI.LtrB intron.  
9 After testing the correct functionality of these plasmids in *Escherichia coli* and *Pseudomonas putida*, we  
10 created a library of LI.LtrB variants carrying cargo DNA sequences of different lengths to benchmark the  
11 capacity of intron-mediated delivery in these bacteria. Next, we combined CRISPR/Cas9-facilitated  
12 counterselection to increase the chances of finding genomic sites inserted with the thereby engineered  
13 introns. By following this pipeline, we were able to insert exogenous sequences of up to 600 bp at  
14 specific genomic locations in wild-type *P. putida* KT2440 and its  $\Delta recA$  derivative. Finally, we were able  
15 to apply this technology to successfully tag this strain with an orthogonal short sequence (barcode) that  
16 acts as a unique identifier for tracking this microorganism in biotechnological settings. The results with  
17 *P. putida* exemplified the value of the Targetron approach for unrestricted delivery of small DNA  
18 fragments to the genomes of Gram-negative bacteria for a suite of genome editing endeavours.

19

20 KEYWORDS: *Pseudomonas putida*, Targetron, genome editing, CRISPR/Cas9, barcode,  
21 orthogonal DNA

22

23

24 *Pseudomonas putida* is a soil bacterium and plant root colonizer that has emerged as one of the species  
25 with the highest potential as a Synthetic Biology chassis for industrial and environmental applications<sup>1,2</sup>.  
26 Qualities of interest include the lack of pathogenicity<sup>3</sup>, its high tolerance to oxidative stress<sup>4,5</sup> (a most  
27 desirable trait in processes such as biofuel production<sup>6</sup>), diverse and powerful capabilities for  
28 catabolizing aromatic compounds<sup>7-9</sup> and ease of genetic and genomic manipulations<sup>10-13</sup>. In particular,  
29 a suite of molecular tools have become available for deletion and insertion of foreign sequences in the  
30 genome of this soil bacterium, both randomly (e.g. with transposon vectors<sup>14,15</sup>) and directed to specific  
31 genomic loci through recombineering<sup>16</sup> or homologous recombination<sup>13</sup> (reviewed in<sup>17</sup>). In this last and

1 most widely used case, note that recombination efficacies vary considerably among different bacterial  
2 groups and even strains of the same species—the archetypal *P. putida* KT2440 specimen being one  
3 particularly suboptimal in *recA*-dependent processes.

4  
5 Group II introns could be a way to overcome this problem. These molecules are a type of retroelements  
6 with the capacity to splice from an mRNA and insert into specific DNA loci (a process known as  
7 retrohoming<sup>18,19</sup>. Their conserved structure and a protein codified by themselves (IEP or Intron-Encoded  
8 Protein) are key components for the splicing and recognition of the target DNA<sup>20,21</sup>. After translation, the  
9 IEP binds specifically to the intronic RNA and assists its splicing process from the exons. Afterwards,  
10 both molecules keep attached forming a ribonucleoprotein (RNP) that will carry out the recognition,  
11 reverse splicing as well as retrotranscription of the intronic RNA into the new DNA molecule<sup>22</sup>. In the  
12 past, several of these introns have been engineered to recognize and insert into specific genes different  
13 from their native retrohoming sites, giving rise to the knock-out system named Targetron<sup>23</sup>.

14  
15 Targetron is founded on LI.LtrB group II intron from *Lactococcus lactis* since it is the most studied intron  
16 of this class and was proven to work in a wide range of bacterial genres, from *Clostridium*<sup>24</sup> or *Bacillus*<sup>25</sup>  
17 to the well-characterized species *Escherichia coli*<sup>23</sup>. Later, Targetron was also surveyed to be exploited  
18 as a delivery system of cargos into designated loci<sup>26–28</sup>. Nevertheless, this attempt highlighted the most  
19 serious limitations group II introns have. First, they can be modified to recognize new sequences but  
20 their integration efficiency can greatly change depending on the new target site. Indeed, mathematical  
21 algorithms have been developed to identify the best retargeting options in a given sequence for  
22 LI.LtrB<sup>23,24</sup> and also for other group II introns<sup>29</sup>. These algorithms retrieve a list of loci ordered by a  
23 predicted score and they also design primers for the modification of the recognition sequences inside  
24 the intron. However, as a result of their probabilistic nature, these predictions are not always reliable.  
25 Secondly, cargo sequences can be inserted inside of group II introns to be transported. In fact, the  
26 optimal region inside of the intron to carry these cargos has been greatly studied. it was described how  
27 domain IVb was the best insertion point and LI.LtrB was modified to display a MluI restriction site at this  
28 position<sup>27</sup>. Yet, the presence of exogenous sequences in this domain also hinders the efficiency of group  
29 II to splice and retrohome to some extent. Therefore, despite the good characteristics of these  
30 molecules, their possibility to be boosted as delivery systems was poorly achieved. Recently, some  
31 efforts to overcome these drawbacks were made when CRISPR/Cas9 technology was merged with

1 Targetron to ease the identification of invaded mutants in *E. coli*<sup>30</sup>. This was accomplished by directing  
2 Cas9 endonuclease to the insertion site of LI.LtrB with the help of specific spacers recognizing this area.  
3 Thereby, if the intron retrohomed into the correct locus, CRISPR/Cas9 will no longer couple with this  
4 region and the invaded mutant will survive. On the other hand, if the intron did not insert, Cas9 will  
5 cleave the bacterial genome and these cells will die. However, the applicability of these two systems in  
6 other species has not been deeply addressed as well as the total capacity of this combination to increase  
7 the size of fragments that can be delivered. In this context, the generation of a sensitive, broad-host  
8 expression system compatible with CRISPR/Cas9 plasmids is required.

9  
10 In the work described below, we have generated a set of SEVA plasmids expressing LI.LtrB intron under  
11 the control of different promoters (IPTG and cyclohexanone induction<sup>31</sup>), origins of replication as well as  
12 antibiotic resistance genes that work in a broad-host-range of Gram-negative bacteria. To test the  
13 correct behaviour of the new expression plasmids, we have engineered them to insert LI.LtrB intron into  
14 different genes of *E. coli* and *P. putida*. Next, we cloned a library of sequences with different sizes inside  
15 pSEVA6511-GIIi to address the possibility of coupling the CRISPR/Cas9 system<sup>32</sup> as a counterselection  
16 mechanism for LI.LtrB insertions in *P. putida* KT2440. Besides, we have selected this Gram-negative  
17 soil bacterium and its *recA* mutant counterpart to validate the utility of this system in strains with little or  
18 non-existent homologous recombination<sup>33</sup>. Finally, we used this technology to successfully label *P.*  
19 *putida* KT2440 with a specific synthetic barcode that could identify and trace down this strain in future  
20 applications<sup>34</sup>. The data presented here not only shows the functionality of the generated system but  
21 also its behaviour in a new microorganism in which Targetron technology had not been assayed before.

## 22 23 RESULTS AND DISCUSSION

24  
25 **Engineering broad-host expression of LI.LtrB intron.** LI.LtrB intron has been exploited to work in  
26 diverse organisms from bacteria or yeast to mammalian cells by using different expression systems.  
27 Commercial Targetron technology has been validated in a wide range of bacterial species such as  
28 *Staphylococcus aureus*<sup>35</sup>, *E. coli*<sup>23</sup>, *L. lactis*<sup>27</sup>, *Shigella flexneri*<sup>36</sup>, *Salmonella typhimurium*<sup>36</sup> or  
29 *Clostridium perfringens*<sup>24</sup>. However, even with this proven broad-host functionality of LI.LtrB, Targetron  
30 has the drawback of having to re-clone and adapt the backbone to the organism at stake that is to be  
31 engineered. This is why there have been several attempts to build broad-host-range plasmids that could

1 work in general Gram-negative bacteria. For instance, a mini-RK2 plasmid with tetracycline resistance  
2 was engineered to express LI.LtrB from the *XylS/Pm* promoter and its activity was surveyed in species  
3 such as *E. coli*, *P. aeruginosa* and *Agrobacterium tumefaciens*<sup>37</sup>.

4

5 The SEVA (Standard European Vector Architecture)<sup>12,38,39</sup> database was launched as one attempt in  
6 Synthetic Biology to establish a standardized and coherent collection of plasmids with both a minimalist  
7 format and nomenclature. The first set of these formatted vectors is composed of different  
8 interchangeable modules including broad-host range origins of replication, antibiotic resistance genes  
9 and a wide set of expression systems and reporter genes. In this context, we decided to couple the  
10 standardization and robustness of SEVA plasmids with the Targetron technology. To this end, we  
11 engineered a collection of pSEVAs to express LI.LtrB intron so that different induction strategies could  
12 be chosen freely according to the sought purpose. First, pSEVA421-GIli (Km) (Supplementary Fig. S1)  
13 was generated and tested in *E. coli* BL21DE3 (Fig. 1A and 1B). This plasmid has a low copy number  
14 (RK2 origin of replication), streptomycin/spectinomycin resistance and the LI.LtrB intron and LtrA (LI.LtrB  
15 IEP) sequences under control of a T7 promoter. The cloned intron was retargeted to insert into the *lacZ*  
16 gene so that blue/white screening could be used to assess the accuracy of the insertion process. In  
17 addition to this, LI.LtrB in this plasmid also carries a retrotransposition-activated selectable marker  
18 (RAM) in domain IVb which has been previously reviewed to increase the likelihood of finding  
19 retrohomed mutants<sup>40</sup>. RAM in pSEVA421-GIli(Km) is composed of Km<sup>R</sup> gene interrupted by a group I  
20 intron. The construct is arranged in a way that only if the intron is inserted, the group I intron is excised  
21 and the Km<sup>R</sup> gene is reconstituted. Therefore, selection in Km plates facilitates the identification of  
22 insertion mutants (Fig. 1A, right plates).

23

24 Since a T7 promoter controls the expression of LI.LtrB, T7 RNA polymerase (T7RNAP) is needed for  
25 transcription. This is why we first checked the activity of this plasmid in *E. coli* BL21DE3 as it has a  
26 bacteriophage  $\lambda$  derivative (prophage DE3) with the T7RNAP gene under the control of the *lacUV5*  
27 promoter<sup>41</sup>. The results of the blue/white screening in the insertion assay performed with pSEVA421-  
28 GIli (Km) showed that the intron seemed to be retrohoming to the selected locus inside the *lacZ* gene  
29 (Fig. 1A). It also highlights the importance of having method to spot insertion mutants. When Km was  
30 supplemented to plates, the number of white colonies was undoubtedly boosted in comparison to the  
31 plates with no selection (Fig. 1A, left plates). Moreover, we observed a slight increase in the number of

1 white colonies when adding the inducer IPTG (~1.5 fold). Finally, colony PCR of white and blue colonies  
 2 was performed to check the correct insertion of the intron in the *lacZ* gene and the correlation with the  
 3 disclosed phenotype (Fig. 1B).  
 4  
 5

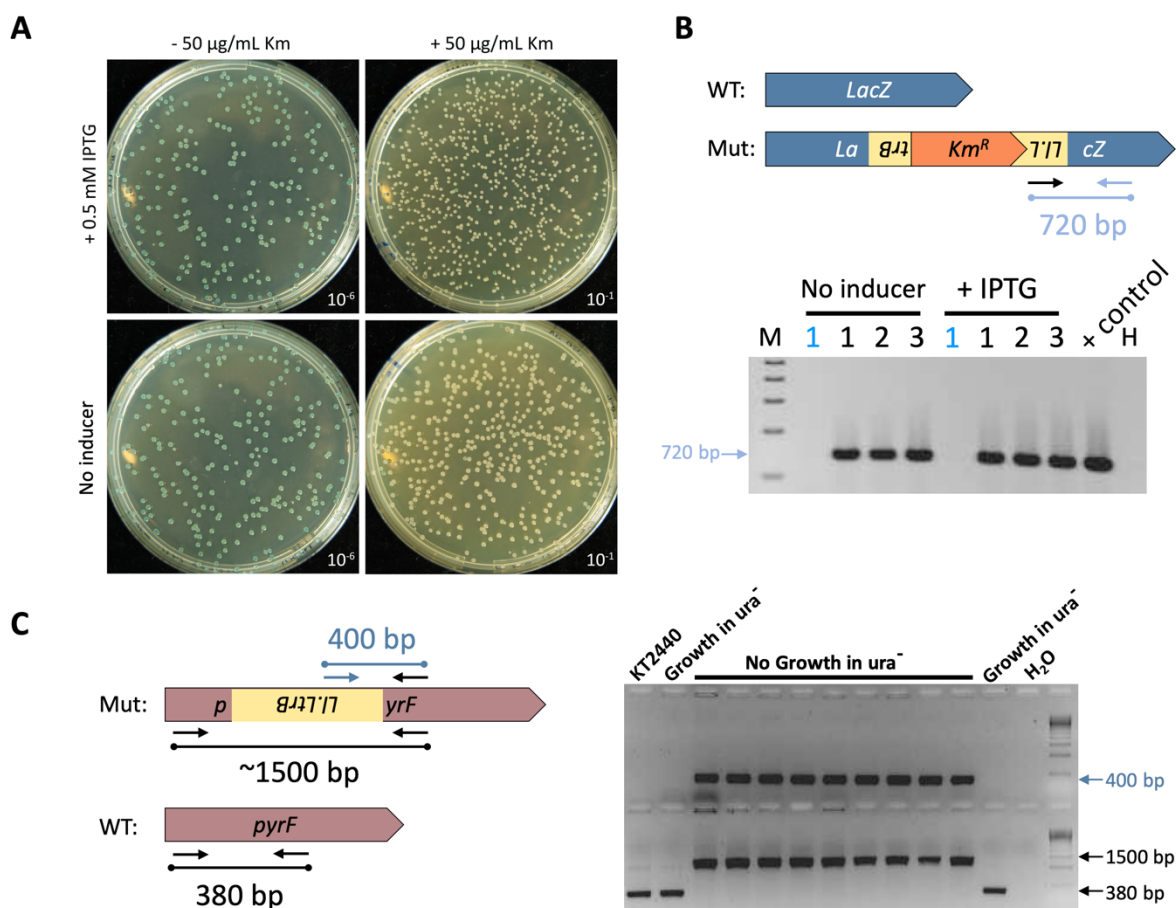

6  
 7  
 8  
 9  
 10  
 11  
 12  
 13  
 14  
 15  
 16  
 17  
 18  
 19  
 20  
 21  
 22  
 23  
 24  
 25

**Figure 1.** SEVA plasmids encoding LI.LtrB group II intron and T7RNAP work in A,B) *E. coli* BL21•DE3 and C) *P. putida* KT2440. A) Delivery of LI.LtrB intron from plasmid pSEVA421-GIIi(Km) in *E. coli* BL21DE3. LI.LtrB intron was retargeted to insert into locus 1063a of *lacZ* gene so that insertions would disrupt this gene, giving rise to white colonies in the presence of X-gal. Since a RAM is placed inside LI.LtrB, kanamycin resistance could be used as a way to select intron insertion mutants (plates to the right). B) PCR reactions to determine the correct insertion of LI.LtrB inside *lacZ* gene. Only if LI.LtrB retrohomes, a PCR amplicon of 720bp is generated. Blue numbers correspond to blue colonies and black numbers correspond to white colonies used as the template material for each reaction. C) Delivery of LI.LtrB from plasmid pSEVA421-GIIi-pyrF and with help of pSEVA131-T7RNAP in *P. putida* KT2440. 5FOA counterselection was used to isolate insertion mutants that were not able to grow without uracil supplemented to plates. Colonies resistant to 5FOA but that were able to grow without uracil were used as negative controls of insertion. Two different PCR reactions are shown: (Top gel) one primer annealed inside LI.LtrB and the second annealed in the *pyrF* gene so that an amplicon could be only generated after intron insertion. (Bottom gel) two primers flanking the insertion locus were used so that two amplicons could be generated. The smallest fragment (380bp) corresponds to the WT sequence and the biggest fragment (1500bp) corresponds to the insertion. The same colonies were tested in both PCR reactions. WT: Wild-type, Mut: Insertion Mutant, + control: reaction with an invaded colony from a previous experiment used as template, H<sub>2</sub>O: Control PCR with no template material.

1  
2 **LI.LtrB intron retrohomes in *P. putida* KT2440.** After testing the efficacy of the new SEVA plasmids,  
3 we decided to check the activity of LI.LtrB in *P. putida* since no previous work has studied the  
4 performance of this group II intron in this species. First, we needed to engineer a new pSEVA for the  
5 heterologous expression of the T7RNAP. The complete sequence of this ORF, along with the regulatory  
6 regions for IPTG-controlled expression (lacUV5 promoter along with a short 5' region of *lacZ* gene fused  
7 to the T7RNAP ORF), were cloned into pSEVA131, yielding pSEVA131-T7RNAP (Supplementary Fig.  
8 S1). This plasmid bears an ampicillin resistance gene (Ap<sup>R</sup>), a pBBR1 origin of replication which confers  
9 a medium copy number of plasmids and, most importantly, is compatible with pSEVA421-GllI(Km). On  
10 the other hand, a *lacZ* gene ortholog is not present in the genome of *P. putida* KT2440. Therefore, we  
11 needed to search for a different reporter gene of insertion. A very useful genetic marker that has been  
12 widely employed in positive and negative selection is the gene URA3 and its homologs. URA3 encodes  
13 the orotidine-5'-phosphate decarboxylase (ODCase) which is an enzyme that participates in the  
14 biosynthetic pathway of pyrimidines in *Saccharomyces cerevisiae*<sup>42</sup>. Thereby, inactivation of this gene  
15 leads to uracil auxotrophy that can be complemented by adding this pyrimidine in media. On the other  
16 hand, ODCase also catalyzes the transformation of 5-fluoroorotic acid (5FOA) into 5-fluorouracil, a toxic  
17 compound that causes cell death<sup>43</sup>. Therefore, negative selection (loss of ODCase activity) is based on  
18 the growth of URA3-disrupted mutants in the presence of 5FOA and uracil in media. Instead, positive  
19 selection works based on complementing the loss of ODCase with an active gene that can be  
20 supplemented through a plasmid or any other exogenous construct. Given that *P. putida* KT2440 is  
21 endowed with an ortholog of URA3 called *pyrF* (PP1815) and that this gene has been already used  
22 several times as a counterselection marker in this strain<sup>44</sup>, we decided that this gene would be an ideal  
23 candidate for LI.LtrB insertion.

24  
25 Once the target gene was chosen, LI.LtrB was retargeted to insert into one specific locus inside this  
26 ORF, giving rise to pSEVA421-GllI(Km)-pyrF. A variant of this plasmid, pSEVA421-GllI-pyrF, was also  
27 generated. The only difference was the absence of RAM since 5FOA-based counterselection could be  
28 applied instead of directly selecting for successfully retrohomed mutants based on Km resistance. Both  
29 plasmids were transformed into *P. putida* KT2440, respectively, along with pSEVA131-T7RNAP and the  
30 insertion assay was performed as in *E. coli*. The only exception was that a longer incubation time (2 h)  
31 was chosen to ensure enough expression levels from both plasmids. After selection in plates

1 supplemented with 5FOA and uracil, growing cells were patched on plates with and without uracil to  
2 search for real *pyrF* mutants. In the case of pSEVA421-GIIi-pyrF, colonies growing on 5FOA/uracil and  
3 being real uracil auxotrophs were identified. Two PCR reactions were set to verify the presence of LI.LtrB  
4 in the *pyrF* gene at the correct site (Fig. 1C). This result demonstrated the ability of LI.LtrB to retrohome  
5 inside *P. putida* KT2440 as it has been shown in other species of this genre like *P. aeruginosa*<sup>37</sup>.  
6 Interestingly, we were not able to identify insertion events when using LI.LtrB::RAM by using either Km  
7 or 5FOA selection. Even though the use of RAMs has been validated in different organisms like *E. coli*  
8<sup>40</sup> and *L. lactis*<sup>45</sup>, the impossibility to find insertion mutants with this selection method was also reported  
9 to happen in *P. aeruginosa*<sup>37</sup>. In that work, the authors stated the possibility of this to be caused by the  
10 lack of processivity of RNA polymerases from hosts. That is, RNA polymerases might not be able to  
11 transcribe the whole sequence of group II introns containing cargos as they would disclose a long and  
12 complex structure. Nevertheless, the authors also envisioned the option to overcome this limitation by  
13 supplying T7RNAP whose processivity and transcription frequency has been previously  
14 demonstrated<sup>41,46,47</sup>. Nevertheless, in our experimental setup, we used this approach and no mutants  
15 were found. Besides, the activity of the pSEVA131-T7RNAP was demonstrated after finding LI.LtrB  
16 insertions by using 5FOA counterselection. This leads us to a second possibility that can be related to  
17 either the excision of the group I intron present inside the RAM or other problems related to the relative  
18 efficiency of splicing of the intron in this species.

19

20 **Simplification of the LI.LtrB expression system and its activity in the  $\Delta recA$  derivative strain of**  
21 ***P. putida* KT2440.** Even if both engineered pSEVAs are functional in general Gram-negative bacteria,  
22 having to transform two plasmids inside the strain to be modified remains a hindrance. With this in mind,  
23 we decided to try out a new and simpler expression system that could alleviate this necessity. By sub-  
24 cloning LI.LtrB and LtrA from pSEVA421-GIIi-pyrF into pSEVA2311<sup>31</sup>, we generated pSEVA2311-GIIi-  
25 pyrF (Supplementary Fig. S1). With a Km<sup>R</sup> and a pBBR1 *oriV*, this vector controls the expression of  
26 LI.LtrB from a ChnR/P<sub>ChnB</sub> promoter regulated by the addition of the aromatic compound cyclohexanone.  
27 This backbone has been previously validated in *E. coli*<sup>31</sup> and also employed to regulate biofilm formation  
28 in *P. putida*<sup>48</sup>. We expected sustained LI.LtrB expression in Gram-negative bacteria under this promoter.

29

30 The same 5FOA-mediated counterselection was used to isolate insertion mutants in both wild-type *P.*  
31 *putida* KT2440 and its  $\Delta recA$  derivative (Fig. 2). Different concentrations of cyclohexanone were



1 employed (0, 0.5, 1 and 5 mM) and, in all cases, we were able to retrieve clones with the retrohomed  
 2 intron in both strains. This supports the ability of LI.LtrB intron to work in a recombinant-independent  
 3 fashion in *P. putida*. This is a feature of group II introns that had been already observed previously in  
 4 other species<sup>33,49</sup>.

5  
 6

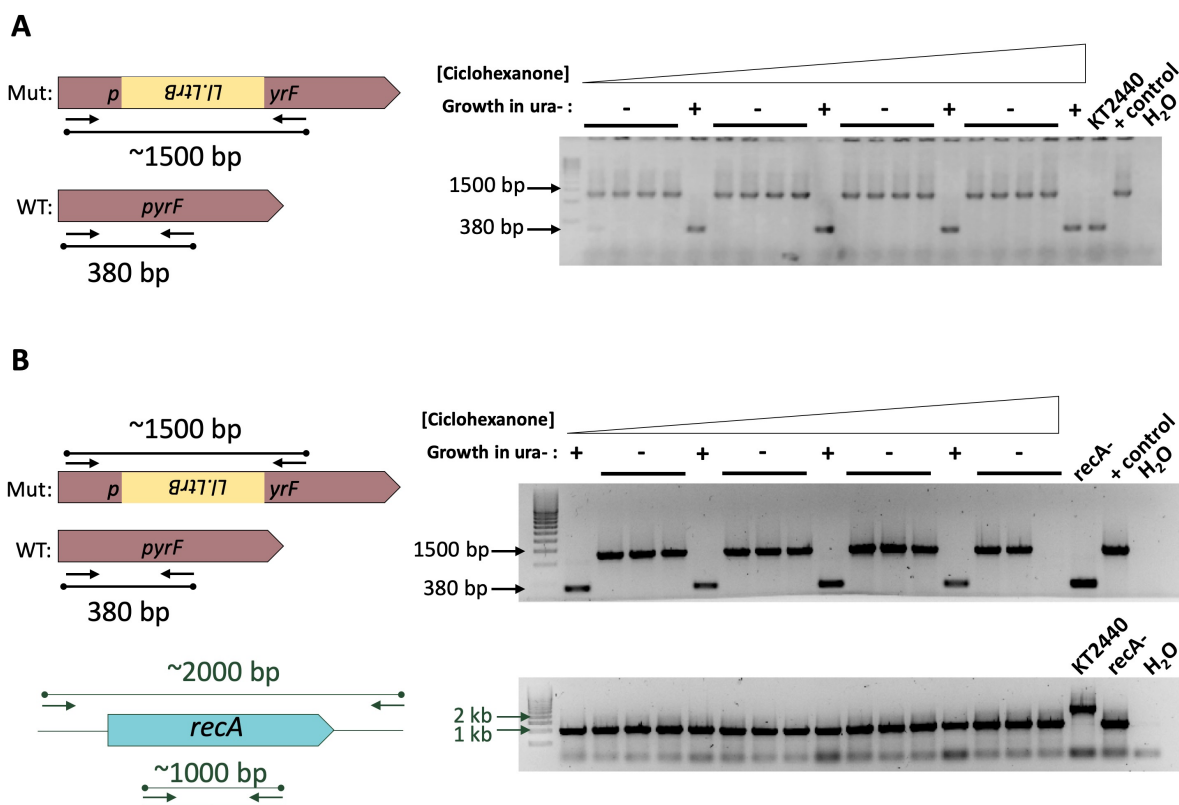

7  
 8

9 **Figure 2.** Performance of pSEVA2311-GII in *P. putida* KT2440 and its  $\Delta recA$  derivative strain. A) pSEVA2311-  
 10 GII works in *P. putida* KT2440 WT to deliver LI.LtrB intron into *pyrF* gene through 5FOA counterselection.  
 11 Different concentrations of cyclohexanone were used from 0mM (left part of gel) to 5mM (right part of gel). A PCR  
 12 reaction that used primers flanking the insertion locus was used to determine LI.LtrB retrohomings. The smallest  
 13 fragment (380bp) corresponds to the WT sequence while the biggest one (1500bp) corresponds to the intron  
 14 insertion. B) pSEVA2311-GII also works in *P. putida* KT2440  $\Delta recA$ . (Top gel) the same PCR reaction with  
 15 flanking primers was performed to determine intron insertions. No amplification was considered as a negative  
 16 result for LI.LtrB insertion and 5FOA resistance was considered to be due to another mechanisms which could  
 17 be affecting the amplification during PCR (i.e. possible deletion of part/entire *pyrF* gene). (Bottom gel) PCR  
 18 reaction to verify *recA* minus genotype of the tested cells. The same colonies were tested in both PCR reactions.  
 19 WT: Wild-type, Mut: Insertion Mutant, KT2440: Parental *P. putida* KT2440 WT was used as template material,  
 20 *recA*<sup>-</sup>: Parental *P. putida* KT2440  $\Delta recA$  was used as template material, + control: reaction with an invaded colony  
 21 from a previous experiment used as template, H<sub>2</sub>O: Control PCR with no template material.

22

23 **Construction of a high copy number plasmid expressing LI.LtrB compatible with CRISPR/Cas9-**  
 24 **mediated counterselection system.** Our next goal was generating a new pSEVA with both oriV and  
 25 antibiotic marker compatible with the CRISPR/Cas9-mediated counterselection engineered previously

1 in our laboratory<sup>30,32</sup>. For this, we built pSEVA6511-Gli and pSEVA6511-Gli(Km) (Supplementary Fig.  
 2 S1). Both plasmids have a high copy number origin of replication (RSF1010), a gentamycin resistance  
 3 gene and a *lacZ*-retargeted LI.LtrB and LtrA controlled by the *ChnR/p<sub>ChnB</sub>* promoter.

4

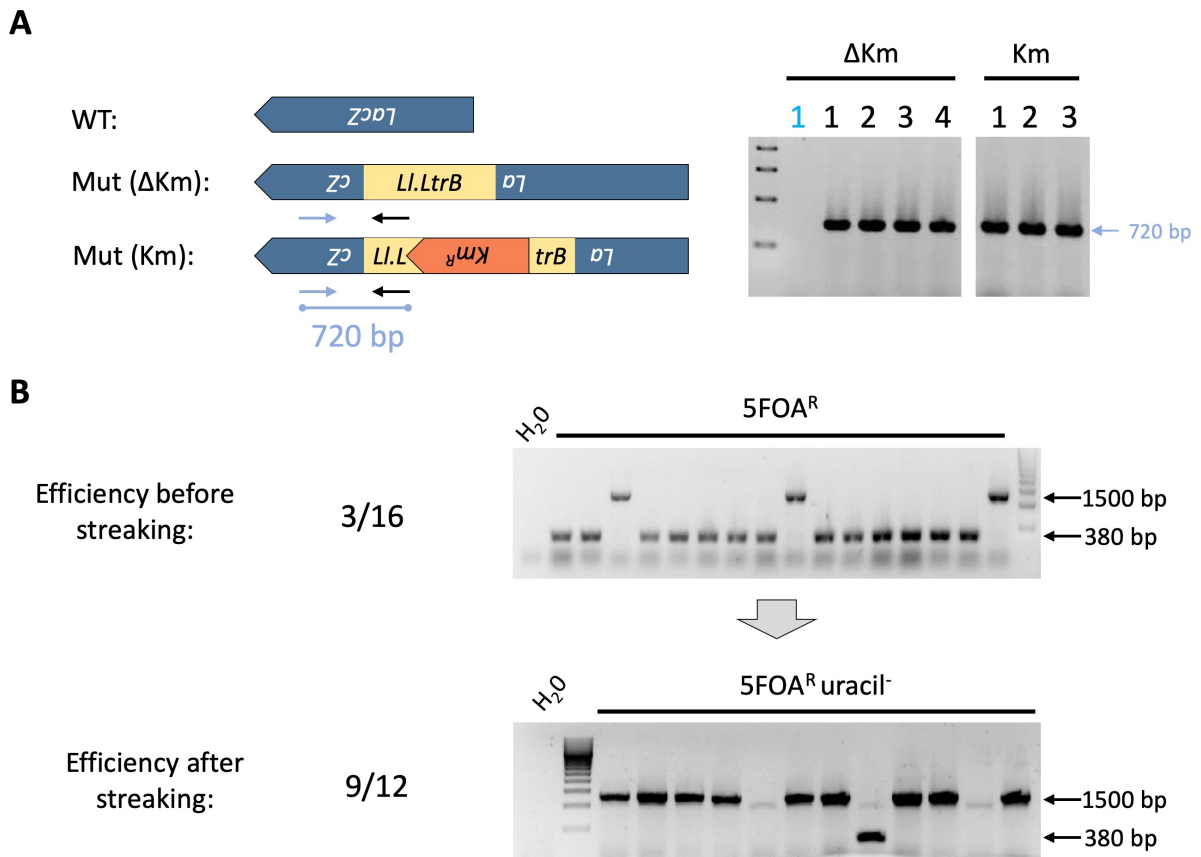

5

6

7 **Figure 3.** Engineered pSEVA6511-Gli expresses correctly LI.LtrB intron in both A) *E. coli* BL21DE3 and B) *P.*  
 8 *putida* KT2440. A) pSEVA6511-Gli(Ø/Km) plasmids express LI.LtrB intron in *E. coli* BL21DE3 and inserts  
 9 correctly inside *lacZ* gene. A PCR reaction where a primer anneals inside LI.LtrB and the other anneals in the  
 10 *lacZ* gene was employed in both cases to verify the correct insertion of the intron. A fragment of 720bp is  
 11 generated when LI.LtrB is present in the selected locus. Blue numbers correspond to blue colonies and black  
 12 numbers correspond to white colonies used as the template material for each reaction B) pSEVA6511-Gli-pyrF  
 13 works in *P. putida* to deliver LI.LtrB intron into the *pyrF* gene with 5FOA counterselection (top gel) and uracil  
 14 auxotrophy (bottom gel). The same PCR reaction using primers flanking the insertion locus inside *pyrF* gene were  
 15 used. An amplicon of 380bp is generated if LI.LtrB is not present (WT) while a fragment of 1500bp is amplified if  
 16 the intron is present (Mut). WT: Wild-type, Mut: Insertion Mutant, H<sub>2</sub>O: Control PCR with no template material.

17

18 The efficacy of these plasmids to deliver LI.LtrB was again tested in *E. coli* BL21DE3 (Fig. 3A) and *P.*  
 19 *putida* KT2440 (Fig. 3B), in this case, after being retargeted towards *pyrF* gene. In the *E. coli* strain, we  
 20 were able to identify insertion mutants in both cases, i.e., with and without Km selection. On the contrary,  
 21 in the case of *P. putida*, we were still unable to find retrohomed mutants when using Km<sup>R</sup> RAM. Still,  
 22 empty LI.LtrB was able to invade *pyrF* which proved the functioning of pSEVA6511-Gli-pyrF in this

1 microorganism. This last experiment also highlighted the level of spontaneous mutations arising to 5FOA  
2 that have already been characterized<sup>44</sup> and the necessity of streaking 5FOA-resistant colonies to verify  
3 their uracil auxotrophy and thus the disruption of the *pyrF* gene. Even so, with no striking, a moderate  
4 frequency of mutants was detected just with 5FOA selection (3 colonies out of 16, which gives a  
5 frequency ~ 18 %). Accordingly, after testing colonies that were unable to grow without uracil in media,  
6 the frequency of detected insertion mutant went up to ~ 75% (9 out of 12 colonies).

7

8 **Limits in the size of fragments that can be delivered by LI.LtrB intron in *P. putida* KT2440 and its**  
9  **$\Delta$ *recA* derivative.** Once pSEVA6511-GIII-pyrF was checked to work in *P. putida*, we proceeded to  
10 survey the idea of exploiting LI.LtrB for exogenous sequences delivery into specific loci in the genome  
11 of this soil bacterium. Group II introns have been previously studied with this approach in mind in  
12 different organisms<sup>27,28,30,50</sup>. Different types of cargos have been employed in these works as well as  
13 different target integration sites. In general, all of them concluded that the size of the sequences inserted  
14 inside LI.LtrB was critical for the splicing and retrohoming efficiency of the intron. In fact, in its native  
15 host, *L. lactis*, cargo sequences longer than 1 kb started to highly hinder the frequency of detected  
16 insertion mutants<sup>27</sup>. Between the results showed above, we stated the unfeasibility of finding  
17 LI.LtrB::RAM mutants in *P. putida*. Since the size of this RAM was 1.2 kb, this corresponds with the  
18 observations of previous works where this fragment length causes LI.LtrB insertions to be undetectable  
19 in some cases. Nevertheless, this same LI.LtrB::RAM was interestingly able to efficiently retrohomed in  
20 *E. coli* (Fig. 1A and 3A) which made us think that this limitation in size could be host-dependent. For this  
21 reason, we decided to study the maximum length of a fragment that LI.LtrB was able to carry in both WT  
22 and  $\Delta$ *recA* *P. putida* KT2440. To do so, we generated a library of pSEVA6511-GIII-pyrF plasmids  
23 carrying fragments of increasing size from the *luxC* gene (Fig. 4A). After this, we perform the same  
24 insertion assay with and without using 5FOA-mediated counterselection with insert sizes of 150 bp  
25 (Lux1), 600 bp (Lux4), 750 bp (Lux5) and 1050 (Lux7). In the case of WT *P. putida* KT2440, we were  
26 able to identify insertion mutants with Lux4 when using 5FOA counterselection. Nonetheless, insertions  
27 with Lux5 or Lux7 were not detected (Supplementary Fig. S2, and Supplementary Table S3). In the case  
28 of not using any type of counterselection, we could only identify one insertion mutant out of 100 colonies  
29 in the case of Lux1, making clear the utility of having a counterselection mechanism. *P. putida*  $\Delta$ *recA*  
30 only showed sign of insertion with the smallest size tested (Supplementary Table S3) which was

1 something surprising as no differences were expected between the two strains regarding LI.LtrB intron  
 2 mobility.

3

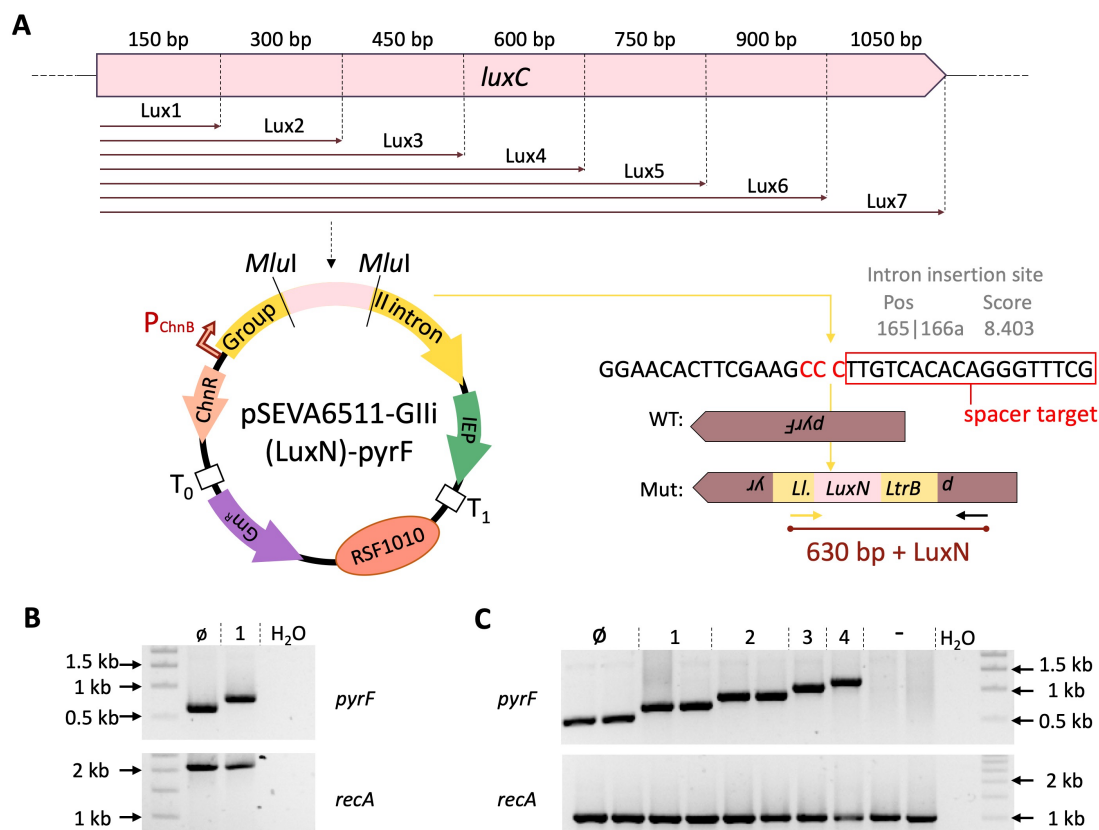

4

5

6 **Figure 4.** Assessing size-restriction of intron-mediated delivery using *luxC* fragments as cargo A) Schematic of  
 7 the intron library generated with increasing fragment length as cargo (from 150bp up to 1050bp) using as template  
 8 the first gene of the *luxCDABEG* operon, *luxC*. LI.LtrB intron in pSEVA6511-Glii(LuxN) is retargeted to insert  
 9 between the nucleotides 165 and 166 of the *pyrF* ORF in the antisense orientation. Spacer *pyrF*1 recognizes the  
 10 region after the insertion site (part of the recognition site is shown inside a red box). The complementary  
 11 nucleotides to the PAM (5'- GGG -3') are highlighted in red. B) L.LtrB-mediated delivery of *luxC* fragments in *P.*  
 12 *putida* KT2440 WT. PCR reaction showing amplifications from colonies with LI.LtrB::Lux∅ and LI.LtrB::Lux1 (top  
 13 gel) and PCR reaction showing the *recA* genotype (bottom gel). WT amplification for *recA* gen is 2 kb long. C)  
 14 LI.LtrB-mediated delivery of *luxC* fragments in *P. putida* KT2440 Δ*recA*. PCR reaction showing amplifications  
 15 from colonies with LI.LtrB::Lux∅ to LI.LtrB::Lux4 (top gel) and PCR reaction showing the *recA* genotype (bottom  
 16 gel). Deletion of the *recA* gene gives an amplification of 1 kb. WT: Wild-type, Mut: Insertion Mutant, LuxN: Cargos  
 17 including from Lux∅ to Lux7, ∅: LI.LtrB with no cargo, 1: LI.LtrB with Lux1 as cargo, 2: LI.LtrB with Lux2 as cargo;  
 18 3: LI.LtrB with Lux3 as cargo, 4: LI.LtrB with Lux4 as cargo, -: *P. putida* KT2440 Δ*recA* colonies with no inserted  
 19 LI.LtrB used as a negative control.

20

21 **Incorporating CRISPR/Cas9-mediated counterselection of LI.LtrB intron insertion.** CRISPR/Cas9-

22 based counterselection has proven to act as a perfect tool to increase the efficiency of different  
 23 mutagenesis procedure by eliminating the WT population of non-modified cells<sup>32,51,52</sup>. CRISPR  
 24 machinery has been described as an adaptive immune system in bacteria<sup>53</sup> and it is composed of two

1 main elements: the CRISPR array and the CRISPR-associated (Cas) proteins. The first component  
2 comprises the Clustered Regularly Interspaced Short Palindromic Repeats (CRISPR itself) and specific  
3 spacers that are placed between these repeats. Regarding Cas proteins, the most outstanding one is  
4 called Cas9, a double-stranded DNA endonuclease that has been greatly employed in CRISPR-  
5 mediated counterselection<sup>32,51</sup>. As the general mechanism, when these two components are expressed,  
6 the spacers are complexed with Cas9 and guide the endonuclease to specific regions in the genome by  
7 base pairing. If their recognition target is closed to a Prostospacer-Adajacent Motive (PAM), Cas9 will  
8 cleave that genomic locus. In this context, by designing spacers that can couple with WT sequences  
9 and cleave them to cause cell death, the likelihood to identify specific mutants in the selected target was  
10 improved, and, as a result, a counterselection method was generated.

11

12 In previous work, we were successfully able to couple this counterselection mechanism with Targetron  
13 technology in *E. coli*<sup>30</sup>. By designing specific spacers that recognize the WT sequence at the insertion  
14 site of group II introns, we were able to facilitate the identification of invaded mutants. As the next step  
15 in our study, we tried to apply this same procedure in *P. putida*. The objective was to test if this  
16 counterselection mechanism could help us to boost the size limit of the fragments that could be delivered  
17 with LI.LtrB. Cells harbouring both pSEVA421-Cas9tr<sup>32</sup> and the corresponding pSEVA6511-Glii(LuxN)-  
18 pyrF were grown overnight and then induced for 4h with cyclohexanone. After this incubation time, an  
19 aliquot of these cells was plated in the presence of 5FOA to estimate the efficiency of intron insertions  
20 with this induction protocol and no CRISPR counterselection. The rest of the cells were made competent  
21 and then, two conditions were tested: Either pSEVA231-CRISPR (a negative control with no specific  
22 spacer) or pSEVA231-C-pyrF1 (with a specific spacer recognizing the insertion locus of LI.LtrB::LuxN)  
23 were transformed into respective aliquots. The last plasmid bears a spacer that has been already  
24 assayed for *pyrF*-mutants counterselection in *P. putida*<sup>32</sup>. If LI.LtrB::LuxN retrohomes, the PAM  
25 sequence necessary for Cas9 activation will be disrupted and mutated cells will be able to survive (Fig.  
26 4A).

27

28 By following this approach, we were able to identify mutated cells in both *P. putida* WT (Fig. 4B and Fig.  
29 5A, B) and  $\Delta recA$  (Fig. 4C and Fig. 5C, D). Nevertheless, we could still not find insertions for fragments  
30 longer than 600 bp (Lux4). In addition to this, this time we were able to isolate mutants with this fragment  
31 size in the  $\Delta recA$  background (Fig. 4C) while we could only identify insertions coming from LI.LtrB::LuxØ

1 and LI.LtrB::Lux1 in *P. putida* WT (Fig. 4B). Regarding the insertion frequencies comparing all  
 2 conditions, the general amount of detected integrations was incremented when transforming  
 3 pSEVA231-C-pyrF1 in both backgrounds (Fig. 5 A, C and Supplementary Tables S4 and S5). Besides,  
 4 with no CRISPR spacer, no insertions with LI.LtrB::Lux2-4 were spotted after surveying a total of ~100  
 5 colonies per condition when transforming pSEVA231-CRISPR (Supplementary Table S5). Taken  
 6 together, these results indicate that the system allows the positive selection of the LL.LtrB integrations  
 7 by counterselecting the population of non-mutated bacteria. The low increase in this efficiency in  
 8 comparison with the results obtained previously with *E. coli*<sup>30</sup> could be explained by the differences in  
 9 the targets selected in each case. In this matter, changing the insertion locus and CRISPR spacer could  
 10 help to further increase the number of mutants and even help to identify integrations with longer  
 11 fragments.

12

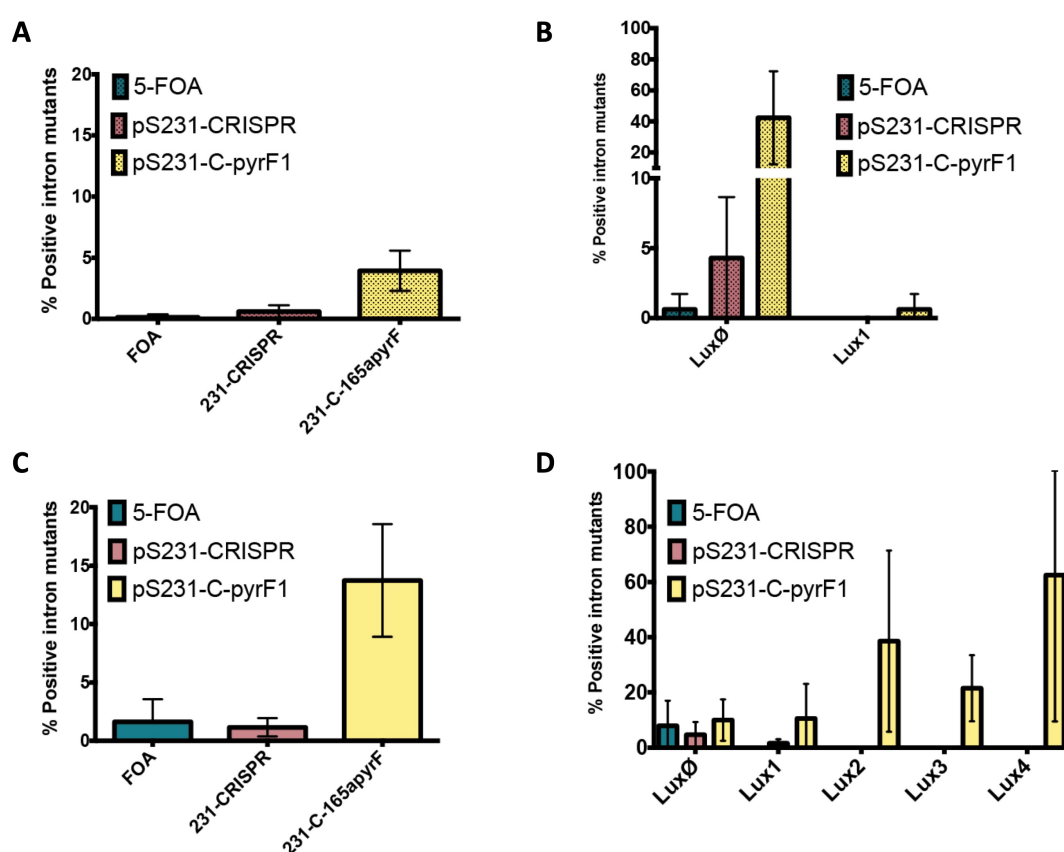

13

14

15 **Figure 5.** Intron insertion frequencies in *P. putida* KT2440 WT and  $\Delta$ recA confirmed through PCR. A) Total intron-  
 16 insertion frequency in *P. putida* KT2440 WT using 5FOA or CRISPR/Cas9-mediated counterselection. B) Intron-  
 17 insertion frequency of each cargo being delivered to the genome of *P. putida* KT2440 WT by LI.LtrB using 5FOA  
 18 or CRISPR/Cas9-mediated counterselection. C) Total intron-insertion frequency in *P. putida* KT2440  $\Delta$ recA using  
 19 5FOA or CRISPR/Cas9-mediated counterselection. D) Intron-insertion frequency of each cargo being delivered  
 20 to the genome of *P. putida* KT2440  $\Delta$ recA by LI.LtrB using 5FOA or CRISPR/Cas9-mediated counterselection.  
 21 The average and standard deviation of two or three replicates are shown.  $\emptyset$ : LI.LtrB with no cargo; 1: LI.LtrB with  
 22 Lux1 as cargo, 2: LI.LtrB with Lux2 as cargo, 3: LI.LtrB with Lux3 as cargo, 4: LI.LtrB with Lux4 as cargo.

1

2 **Application of LI.LtrB for the delivery of small genetic fragments that can be used as traceable**

3 **barcodes.** Tracing genetically modified strains along with their pedigrees and modifications can be very  
4 challenging. Nevertheless, this is a critical step for the sake of archiving and also for biosafety in case  
5 we happen to deliver those strains into the environment. One solution for this could be the use of small  
6 pieces of synthetic DNA (a.k.a. genetic barcodes) that could serve as identifiers of particular strains. By  
7 introducing these barcodes in the genomes of modified cells, we can create a physical link between this  
8 engineered organism and its digital counterpart. This idea has been described previously along with a  
9 version control system for microbial strains (named CellRepo) where all important information about  
10 barcoded strains can be archived and consulted in repositories<sup>34,54</sup>. In this way, after barcoding one  
11 strain, one only needs to sequence the barcode to retrieve all the available information about that strain  
12 on the website, including laboratory of origin, developer, modifications, resistances, etc.

13

14 As we have shown above along with data previously published about the performance of LI.LtrB intron  
15 in other organisms<sup>27</sup>, group II introns seems to be particularly useful for the delivery of small fragments  
16 of DNA. Therefore, we thought they could be an optimum tool for the delivery of orthogonal sequences  
17 as barcodes/unique identifiers to the genomes of desired strains as they have a small size (148 bp,  
18 Supplementary Fig. S3). As proposed in<sup>34</sup>, an optimal barcode structure is composed by a universal  
19 primer (25 nt), which is shared by all barcodes generated with the CellRepo software, and a core  
20 sequence (123 nt) which is subdivided into three components: the barcode sequence itself (96 nt), the  
21 synchronization (9 nt) and the checksum (18 nt) sequences<sup>34</sup>. The last two elements are incorporated  
22 as an error-correction mechanism. This way, even if truncated or incorrect reads are retrieved, the  
23 CellRepo algorithm is still able to identify the barcode and its linked strain profile content. On the other  
24 hand, some of the main features of group II introns are that, first, they insert themselves stably in DNA  
25 molecules as it has been proven for them to generate stable integrations after more than 80  
26 generations<sup>28,50</sup>. Second, as it was already stated, they can function in a wide range of hosts<sup>24,25,27,35,36</sup>.  
27 Third, group II introns can be retargeted to insert into virtually any desired loci of choice and they have  
28 high specificity for their target<sup>23,29</sup>. Finally, as we have also shown, they are independent of the RecA-  
29 based homologous recombination machinery, which is an advantage compared to other approaches  
30 to the same end<sup>30,33</sup>. Considering all this, we decided to examine LI.LtrB as the carrier of a specific barcode  
31 to label *P. putida* KT2440. First, we synthesized the specific barcode generated with the CellRepo

1 algorithm by using two overlapping oligonucleotides (Supplementary Fig. S3) and then we cloned it into  
 2 pSEVA6511-GIIi to generate pSEVA6511-GIIi(B3).

3

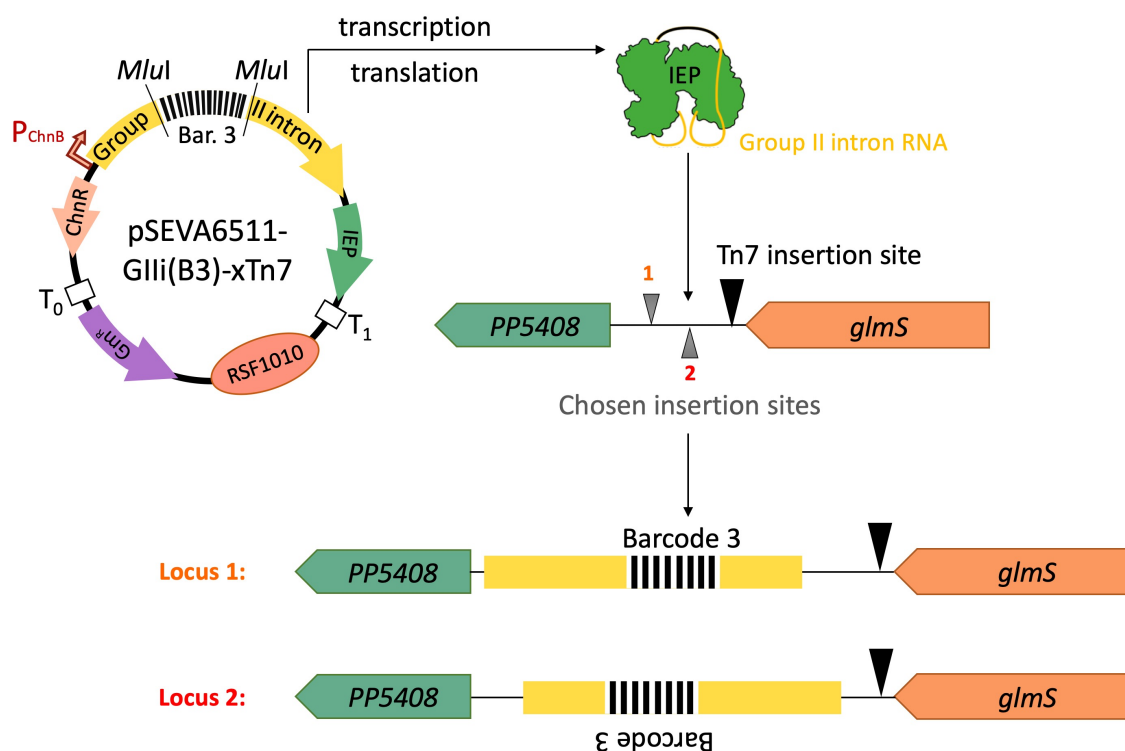

4  
 5  
 6

7 **Figure 6.** Application of LI.LtrB group II intron for the delivery of specific genetic barcodes to the genome of *P.*  
 8 *putida* KT2440 WT. Selection of the insertion loci for LI.LtrB::B3 in the vicinity of the Tn7-insertion site (black  
 9 triangle). Two different insertion points (grey triangles) were chosen for the insertion list generated in the Clostron  
 10 website and LI.LtrB::B3 was retargeted to both sites accordingly. The recognition site in Locus 1 (orange)  
 11 is located in the sense strand while Locus 2 (red) is present in the antisense strand of *P. putida*'s genome. LI.LtrB::B3  
 12 insertion would generate two different genotypes depending on the locus being targeted in each case.

13

14 Next, we searched for good targeting loci in the genome of *P. putida*. As barcodes are meant to link a  
 15 strain to its digital data, they need to be included in a stable and favourable genetic locus. This is why  
 16 we chose intergenic regions close to well-known essential genes in *P. putida*. Thereby, *glmS* context  
 17 was selected as a good candidate for the insertion of LI.LtrB::B3. Two different insertion loci were  
 18 selected from the retrieved list after using Clostron algorithm to survey the intergenic region between  
 19 *PP5408* and *glmS* (Fig. 6 and Supplementary Fig. S4). Then, LI.LtrB was retargeted towards these two  
 20 loci, giving rise to pSEVA6511-GIIi(B3)-37s and pSEVA6511-GIIi(B3)-94a, respectively (Fig. 6). Next,  
 21 specific spacers for both loci were designed and tested to see the efficiency of cleavage which was  
 22 about one order of magnitude in both cases (Supplementary Fig. S5). After these two components were  
 23 ready, we performed the same insertion protocol we had already established for the delivery of *luxC*



1 fragments. Obtained colonies were directly checked through pool PCR reactions to analyze a high  
2 number of colonies at once as no phenotype change was expected after the insertion of LI.LtrB. Only in  
3 the case of locus 2, insertion mutants were located with the corresponding barcode sequence (Fig. 7).  
4 Additional PCRs were performed to secure the purity of the final mutated colony (data not shown) and  
5 the barcode integrity was confirmed through sequencing (Details about the final barcoded strain can be  
6 found in the public CellRepo repository  
7 [https://cellrepo.ico2s.org/repositories/93?branch\\_id=139&locale=en](https://cellrepo.ico2s.org/repositories/93?branch_id=139&locale=en)). This final result emphasizes the  
8 utility of having an external counterselection system to improve the screening of LI.LtrB insertions as, in  
9 most cases, a phenotype change is not expected in thereby watermarked cells. Moreover, in this last  
10 case, the scores predicted for both loci (4.438 and 1.719, Supplementary Fig. S4) were much lower than  
11 those obtained for the *lacZ* (9.188) and *pyrF* (8.403) gene. It is been previously stated in the text how  
12 this score is just a prediction and cannot be blindly relied on. However, it is important to consider it to  
13 fully assess the utility of the CRISPR/counterselection system in these cases where a low efficiency of  
14 insertion is to be expected.

15

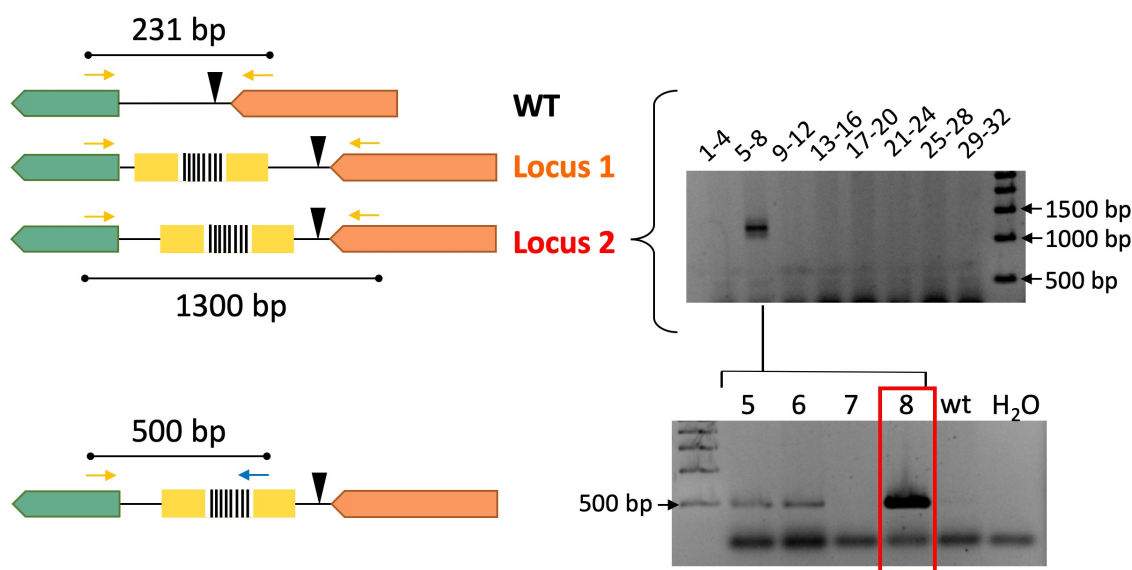

16

17

18 **Figure 7.** Delivery of LI.LtrB::B3 into *P. putida* KT2440 WT genome. A first pool PCR was set to detect LI.LtrB::B3  
19 successful insertions in either Locus 1 (orange) or locus 2 (red). The top gel shows the amplification found with a  
20 pool PCR using primers flanking the insertion locus 2. The bottom gel shows the second PCR of individual  
21 colonies from the corresponding pool to find the barcoded clone. In this case, a primer annealing inside the  
22 barcode (pbarcode universal) and other annealing inside *PP5408* gene were used. WT: Wild-type, Locus 1:  
23 37,37s insertion site, Locus 2: 94,95a insertion site. *PP5408* (green gene), *glmS* (orange gene).

24

1 **Conclusion.** While *P. putida* KT2440 is a strain that has made evident its utility in biotechnological  
2 applications, there is still a need to develop new tools that can be used to modify this bacterium and  
3 broaden its applicability. Moreover, it is important to build these new tools in a broad-host-range manner  
4 that would allow their use in other bacteria with little modification. Our work tried to expand the number  
5 of genetic devices that can be exploited to insert sequences of certain length at specific genomic regions  
6 by using group II introns. Also, a wide-host format was adopted by expressing LI.LtrB intron from different  
7 SEVA plasmids that are functional in general Gram-negative bacteria. The efficacy of these pSEVAs  
8 was tested in *E. coli* and *P. putida* KT2440 WT as well as in its derivative  $\Delta recA$ , highlighting one of the  
9 main advantages of this technology which is its independence of homologous recombination. Finally,  
10 we also validated the possibility of coupling group II introns and CRISPR/Cas9-mediated  
11 counterselection in *P. putida* to improve the efficiency of searching for insertion mutants and  
12 demonstrated its use in the labelling of particular strains with genetic barcodes.

13

## 14 METHODS

15

16 **Bacterial strains and media.** *E. coli* CC118 strain [ $\Delta(ara-leu)$ , *araD139*,  $\Delta lacX74$ , *galE*, *galk phoA20*,  
17 *thi-1*, *rpsE*, *rpoB*, *argE* (Am), *recA1*, *OmpC*<sup>+</sup>, *OmpF*<sup>+</sup>] was used for plasmid cloning and propagation  
18 and BL21DE3 strain [*fhuA2*, [*lon*], *ompT*, *gal*, ( $\lambda$  DE3), [*dcm*],  $\Delta hsdS$ ; ( $\lambda$  DE3) =  $\lambda$  sBamHIo  $\Delta EcoRI$ -B  
19 *int::(lacI::PlacUV5::T7 gene1) i21  $\Delta nin5$* ] for intron mobility assays in *E. coli*. *P. putida* KT2440 and its  
20 derivative  $\Delta recA$  were used to assess intron mobility in this specie. Luria-Bertani (LB) medium was used  
21 for general growth and was supplemented when needed with kanamycin (Km; 50  $\mu$ g/mL), ampicillin (Ap;  
22 150  $\mu$ g/mL for *E. coli* and 500  $\mu$ g/mL for *P. putida*), gentamycin (Gm; 10  $\mu$ g/mL for *E. coli* and 15  $\mu$ g/mL  
23 for *P. putida*) and/or streptomycin (Sm; 50  $\mu$ g/mL). For solid plates, LB medium was supplemented with  
24 1.5% of agar (w/v). In specific cases for *P. putida*, M9 minimal medium [6 g L<sup>-1</sup> Na<sub>2</sub>HPO<sub>4</sub>, 3 g L<sup>-1</sup>  
25 KH<sub>2</sub>PO<sub>4</sub>, 1.4 g L<sup>-1</sup> (NH<sub>4</sub>)<sub>2</sub>SO<sub>4</sub>, 0.5 g L<sup>-1</sup> NaCl, 0.2 g L<sup>-1</sup> MgSO<sub>4</sub>·7H<sub>2</sub>O] supplemented with sodium  
26 citrate at 0.2% (w/v) as the carbon source was used instead. X-gal (5-Bromo-4-chloro-3-indolyl- $\beta$ -D-  
27 galactopyranoside) was added at a final concentration of 30  $\mu$ g/mL to carry out blue/white colony  
28 screening. Moreover, different inducers were added to media when necessary: isopropyl-1-thio-b-  
29 galactopyranoside (IPTG) was added at 0.5 mM (*E. coli*) or 1mM (*P. putida*) and cyclohexanone at 1  
30 mM if not stated differently.

31

1 **Plasmid construction.** The complete sequence encoding the T7 promoter, LI.LtrB intron and LtrA  
2 protein was amplified from the commercial plasmid pACD4K-C (Targetron gene knockout system,  
3 Sigma-Aldrich) with primers pGllintron\_fwd and rev (Supplementary Table S1). The amplified fragment  
4 was then digested with PaeI and SpeI restriction enzymes and cloned into a similarly digested  
5 pSEVA427, yielding pSEVA421-GllI(Km). On the other hand, *lacUV5* promoter along with T7 RNA  
6 polymerase (T7RNAP) sequences were amplified from pAR1219 (Merck, Sigma-Aldrich) with primers  
7 pAR1219\_fwd and rev, PaeI/SpeI digested and cloned into corresponding sites of pSEVA131,  
8 generating pSEVA131-T7RNAP, necessary for the transcription of LI.LtrB intron from the T7 promoter.  
9 To eliminate the retrotransposition-activated selectable marker (RAM) present inside LI.LtrB,  
10 pSEVA421-GllI(Km) was digested with MluI restriction enzyme and then directly ligated and transformed  
11 to obtain pSEVA421-GllI. To change the expression system and simplify the intron expression  
12 mechanism, only LI.LtrB (with or without RAM) and LtrA sequences were extracted by HindIII/SpeI  
13 digestion of pSEVA421-GllI and cloned into pSEVA2311, giving rise to pSEVA2311-GllI(Km) and  
14 pSEVA2311-GllI, respectively. These plasmids have both LI.LtrB intron and LtrA expression controlled  
15 under the *ChnR-P<sub>ChnB</sub>* promoter. Finally, to assemble an expression plasmid compatible with the  
16 CRISPR/Cas9 system described previously<sup>32</sup>, it was necessary to modify both the origin of replication  
17 and the antibiotic resistance gene. For that, the *ChnR-P<sub>ChnB</sub>* promoter, LI.LtrB (with and without RAM)  
18 and LtrA sequences were extracted by digestion with PaeI/SpeI enzymes and cloned into pSEVA651  
19 equivalent sites to obtain pSEVA6511-GllI(Km) and pSEVA6511-GllI. The CRISPR/Cas9  
20 counterselection approach used in this work was described in<sup>32</sup> and is based on plasmids pSEVA421-  
21 Cas9tr and pSEVA231-CRISPR. pSEVA231-C-pyrF1 was generated and described in the same work.  
22 The rest of the spacers for counterselection were designed manually and cloned into BsaI-digested  
23 pSEVA231-CRISPR, following the protocol explained in the same paper. The resulting plasmids were  
24 named pSEVA231-C-37s and pSEVA231-C-94a.

25

26 **Retargeting of LI.LtrB intron.** Retargeting of LI.LtrB intron was performed by adapting the Targetron  
27 protocol from Sigma-Aldrich. First, Clostron platform was used to design primers pIBS-X, pEBS1d-X,  
28 pEBS2-X and pEBSuniversal (depending on the insertion target; Supplementary Table S1) with  
29 corresponding target sequences as query (*lacZ* gene in *E. coli*; *pyrF* gene and PP5408-glmS region in  
30 *P. putida*). From the output list, the best-ranked targets compatible with CRISPR/Cas9 technology were  
31 selected in each case. This means targets with PAM sequences (5'-NGG-3' in the case of Streptococcus

1 pyogenes system) closest to the insertion site of the intron were chosen. Afterwards, Clostron-designed  
2 oligonucleotides for each target were used in a SOEing PCR with pACD4K-C as a template to yield a  
3 350bp fragment. For the cloning of this amplicon, different strategies were adopted attending to the final  
4 recipient plasmid. For the retargeting of pSEVA421-GII and its derivatives, the fragment was digested  
5 with BsrGI/HindIII restriction enzymes and ligated into the linearized recipient plasmid. For retargeting  
6 of pSEVA2311-GII and pSEVA6511 derivatives, Gibson assembly was chosen as the cloning procedure  
7 since an additional BsrGI restriction sites was present in the pChnB promoter. Primers pRetarget-fwd and  
8 rev were used to reamplify the SOEing amplicon and add the corresponding homologous sequences to  
9 directly assemble the fragment to HindIII/HpaI-digested pSEVA2311/6511-GII.

10

11 **Insertion of exogenous sequences inside LI.LtrB.** All exogenous sequences inserted inside LI.LtrB  
12 intron were cloned into the MluI site present in the intron sequence. In the case of the insert to be  
13 delivered, two strategies were followed: *LuxC* gene from the lux operon was employed as a template for  
14 the generation of fragments of different sizes (from 150bp to 1050bp with a difference of 150bp each).  
15 Primer pLux\_fwd in combination with primers pLux1-7\_rev (Supplementary Table S1) respectively were  
16 used in a PCR step to generate each fragment using as template pSEVA256. Each amplicon was then  
17 digested with MluI and cloned into linearized pSEVA6511-GII-pyrF. The orientation of each fragment  
18 was confirmed by sequencing. Barcode sequences were created in the CellRepo website  
19 (<https://cellrepo.herokuapp.com>) with an algorithm that provides universally unique identifiers (UUIDs)  
20 (ref Natalio). This provides the possibility to produce a large library of barcodes randomly generated and  
21 unique. After selecting one specific barcode, a BLAST search was done to make sure there was no  
22 other region with high similarity in the genome of *P. putida*. Once a barcode was verified, it was  
23 generated by a PCR step with 119-mer oligonucleotides bearing 30 overlapping nucleotides at 3'. These  
24 primers also included 30 nucleotides complementary to the recipient vector at 5', so Gibson assembly  
25 reaction could be performed after amplification with MluI-digested pSEVA6511-GII.

26

27 **Interference assay of spacers 37s and 94a.** *P. putida* KT2440 strain harbouring pSEVA421-Cas9tr  
28 was grown overnight and electrocompetent cells were prepared by washing cells with 300mM sucrose  
29 a total of 5 times. The final pellet was resuspended on 400  $\mu$ L and then split into 100  $\mu$ L aliquots. One  
30 hundred nanograms of pSEVA231-CRISPR (control), pSEVA231-C-37s or 94a (Supplementary Table  
31 S2) were electroporated into respective aliquots. Transformed bacteria were grown in LB/Sm for 2h at

1 30°C and serial dilutions were then plated on LB/Sm to test viability and LB/Sm/Km plates to assess the  
2 efficiency of cleavage. After counting CFUs on both conditions, the ratio of transformation efficiency was  
3 calculated by dividing the CFUs on LB/Sm plates by CFUs on LB/Sm/Km plates both normalized to 10<sup>9</sup>  
4 cells.

5

6 **LI.LtrB insertion assay in *E. coli*.** Briefly, cells harbouring the corresponding LI.LtrB pSEVA derivative  
7 plasmid were grown in LB supplemented with the corresponding antibiotics. When an OD of 0.2 was  
8 reached, the right inducers were added to the medium and cells were incubated at 30°C for different  
9 periods (from 30 min to 4h depending on the expression system). When IPTG was used, cells were  
10 washed and recuperated in fresh media after the induction period. Finally, serial dilutions were plated to  
11 assess viability and intron insertion efficiency on selective media when possible.

12

13 **LI.LtrB insertion assay in *P. putida*.** The same protocol described above for *E. coli* was used with *P.*  
14 *putida* strains with the only difference that the induction time was 2h or 4h (depending on expression  
15 system) and no recovery was performed after induction. Also, as *pyrF* gene was the target of LI.LtrB  
16 insertion, cells were plated on M9 minimal media supplemented with only 20 µg/mL uracil (Ura) to  
17 assess viability or uracil and 250 µg/mL 5FOA (5-Fluoroorotic acid) to counter select *pyrF*-disruption  
18 mutants and make easier the identification of insertion events.

19

20 **CRISPR/Cas9 counterselection assay in *P. putida* KT2440 and KT2440  $\Delta$ *recA*.** When  
21 CRISPR/Cas9 counterselection was to be applied, the protocol was adapted to simplify the process.  
22 Cells harbouring both pSEVA421-Cas9tr and pSEVA6511-GIII derivative were grown overnight at 30°C.  
23 Next day, 1 mM cyclohexanone was added to the culture and cells were induced for 4h at 30°C. After  
24 this incubation, 1mL of cells were plated on M9 minimal media supplemented with uracil and 5FOA to  
25 assess the native efficiency of insertion in this condition. Later, cells were made electrocompetent and  
26 100 ng of pSEVA231-CRISPR or pSEVA231-C-spacer (*pyrF*1, 37s or 94a depending on the experiment)  
27 were electroporated. Finally, cells were recovered in LB/Sm for 2h at 30°C, period after which serial  
28 dilutions were plated on LB/Sm (to assess viability) and LB/Sm/Km (to assess counterselection  
29 efficiency).

30

1 **Analysis of LI.LtrB insertion by colony PCR.** LI.LtrB integrations were studied by colony PCR to  
2 check the presence or absence of the intron in the correct loci. Two possible reactions were used: In  
3 one, primers flanking the insertion site to amplify the whole intron were used. The product of this PCR  
4 would be composed of the intron sequence and the amplified flanking regions. In the second, one primer  
5 annealed in the target locus and the other inside the intron sequence, consequently a PCR product was  
6 only obtained when LI.LtrB intron was present. In the case of barcode delivery, pool PCR reactions with  
7 a total of 4 colonies per reaction were set first. PCRs were analyzed by electrophoresis on agarose gel  
8 and 1xTAE (Tris-Acetate-EDTA). EZ Load 500bp Molecular Ruler (Brio-Rad) was the DNA ladder in all  
9 gels.

10

11 Associated content

12

13 Supporting information

14

15

16 **Supplementary Table S1:** List of oligonucleotides used in this study

17 **Supplementary Table S2:** List of plasmids used in this work

18 **Supplementary Table S3:** Insertion frequencies of LI.LtrB::Lux1 and LI.LtrB::Lux4 in *P. putida*  
19 KT2440 WT and  $\Delta recA$  with no CRISPR/Cas9-mediated  
20 counterselection.

21 **Supplementary Table S4:** Insertion frequency of LI.LtrB::LuxN intron in *P. putida* KT2440 WT  
22 with 5FOA CRISPR/Cas9-mediated counterselection.

23 **Supplementary Table S5:** Insertion frequency of LI.LtrB::LuxN intron in *P. putida* KT2440  $\Delta recA$   
24 with 5FOA CRISPR/Cas9-mediated counterselection.

25

26 **Supplementary Figure S1:** pSEVA plasmids for the expression of LI.LtrB intron in a wide range of  
27 Gram-negative bacteria.

28 **Supplementary Figure S2:** Assessing size-restriction of intron-mediated delivery using *luxC*  
29 fragments as cargo and 5-FOA counterselection in log-phase induced  
30 cells.

- 1 **Supplementary Figure S3:** Barcode generation with a PCR using 3'-overlapping 119-mer  
2 oligonucleotides.
- 3 **Supplementary Figure S4:** Application of GliI as a barcode delivery system.
- 4 **Supplementary Figure S5:** Design and test of Locus 1 and 2 spacers for CRISPR/Cas9-mediated  
5 counterselection of LI.LtrB::B3 group II intron.

6

## 7 AUTHOR INFORMATION

### 8 Corresponding Author

9 Víctor de Lorenzo—Systems Biology Program, Centro Nacional de Biotecnología (CNB-CSIC), 28049  
10 Madrid, Spain; [orcid.org/0000-0002-6041-2731](https://orcid.org/0000-0002-6041-2731); Phone: (34-91) 585 4536; Email:  
11 [vdlorenzo@cnb.csic.es](mailto:vdlorenzo@cnb.csic.es); Fax: (34-91) 585 4506

### 12 Authors

13 Elena Velazquez— Systems and Synthetic Biology Department, Centro Nacional de Biotecnología  
14 (CNB-CSIC), Campus de Cantoblanco, Madrid 28049, Spain. [orcid.org/0000-0002-0133-0461](https://orcid.org/0000-0002-0133-0461)

15 Yamal Al-Ramahi— Systems and Synthetic Biology Department, Centro Nacional de Biotecnología  
16 (CNB-CSIC), Campus de Cantoblanco, Madrid 28049, Spain.

17

18 Jonathan Tellechea-Luzardo – Interdisciplinary Computing and Complex Biosystems (ICOS). Research  
19 Group, Newcastle University, Newcastle Upon Tyne NE4 5TG, U.K. [orcid.org/0000-0003-2198-4558](https://orcid.org/0000-0003-2198-4558)

20

21 Natalio Krasnogor – Interdisciplinary Computing and Complex Biosystems (ICOS) Research Group,  
22 Newcastle University, Newcastle Upon Tyne NE4 5TG, U.K.; [orcid.org/0000-0002-2651-4320](https://orcid.org/0000-0002-2651-4320)

23

24 **Author Contributions.** EV, VdL and NK planned the experiments; EV and JT did the practical work.  
25 All Authors analyzed and discussed the data and contributed to the writing of the article.

26

27 **Funding.** This work was funded by the SETH (RTI2018-095584-B-C42) (MINECO/FEDER), SyCoLiM  
28 (ERA-COBIOTECH 2018 - PCI2019-111859-2) Project of the Spanish Ministry of Science and

1 Innovation. MADONNA (H2020-FET-OPEN-RIA-2017-1-766975), BioRoboost (H2020-NMBP-BIO-  
2 CSA-2018-820699), SynBio4Flav (H2020-NMBP-TR-IND/H2020-NMBP-BIO-2018-814650) and MIX-  
3 UP (MIX-UP H2020-BIO-CN-2019-870294) Contracts of the European Union and the InGEMICS-CM  
4 (S2017/BMD-3691) Project of the Comunidad de Madrid - European Structural and Investment Funds -  
5 (FSE, FECER). N.K acknowledges the Engineering and Physical Sciences Research Council (EPSRC)  
6 grant “Synthetic Portabolomics: Leading the way at the crossroads of the Digital and the Bio Economies  
7 (EP/N031962/1)”, and the Royal Academy of Engineering Chair in *Emerging Technologies* award.

8

9 **Notes.** The authors declare no competing financial interest

10

## 11 REFERENCES

12

- 13 1. Nikel, P. I., and de Lorenzo, V. (2018) *Pseudomonas putida* as a functional chassis for industrial  
14 biocatalysis: From native biochemistry to trans-metabolism. *Metab. Eng.* 50, 142–155.
- 15 2. Nikel, P. I., Martínez-García, E., and de Lorenzo, V. (2014) Biotechnological domestication of  
16 pseudomonads using synthetic biology. *Nat. Rev. Microbiol.* 12, 368–379.
- 17 3. Kampers, L. F. C., Volkers, R. J. M., and Martins Dos Santos, V. A. P. (2019) *Pseudomonas putida*  
18 KT2440 is HV1 certified, not GRAS. *Microb. Biotechnol.* 12, 845–848.
- 19 4. Kim, J., and Park, W. (2014) Oxidative stress response in *Pseudomonas putida*. *Appl. Microbiol.*  
20 *Biotechnol.* 98, 6933–46.
- 21 5. Nikel, P. I., Fuhrer, T., Chavarría, M., Sánchez-Pascuala, A., Sauer, U., and de Lorenzo, V. (2021)  
22 Reconfiguration of metabolic fluxes in *Pseudomonas putida* as a response to sub-lethal oxidative  
23 stress. *ISME J.* <https://doi.org/10.1038/s41396-020-00884-9>
- 24 6. Liao, J. C., Mi, L., Pontrelli, S., and Luo, S. (2016) Fuelling the future: Microbial engineering for the  
25 production of sustainable biofuels. *Nat. Rev. Microbiol.* 14, 288–304.
- 26 7. Jiménez, J. I., Miñambres, B., García, J. L., and Díaz, E. (2002) Genomic analysis of the aromatic  
27 catabolic pathways from *Pseudomonas putida* KT2440. *Environ. Microbiol.* 4, 824–41.
- 28 8. Ramos, J. L., Duque, E., Huertas, M. J., and Haidour, A. (1995) Isolation and expansion of the  
29 catabolic potential of a *Pseudomonas putida* strain able to grow in the presence of high



- 1 concentrations of aromatic hydrocarbons. *J. Bacteriol.* 177, 3911–3916.
- 2 9. Martínez, I., Mohamed, M. E. S., Rozas, D., García, J. L., and Díaz, E. (2016) Engineering synthetic  
3 bacterial consortia for enhanced desulfurization and revalorization of oil sulfur compounds. *Metab.*  
4 *Eng.* 35, 46–54.
- 5 10. Martínez-García, E., Nickel, P. I., Aparicio, T., and de Lorenzo, V. (2014) *Pseudomonas* 2.0: Genetic  
6 upgrading of *P. putida* KT2440 as an enhanced host for heterologous gene expression. *Microb.*  
7 *Cell Fact.* 13, 159.
- 8 11. Lieder, S., Nickel, P. I., de Lorenzo, V., and Takors, R. (2015) Genome reduction boosts  
9 heterologous gene expression in *Pseudomonas putida*. *Microb. Cell Fact.* 14, 23.
- 10 12. Silva-Rocha, R., Martínez-García, E., Calles, B., Chavarría, M., Arce-Rodríguez, A., De Las Heras,  
11 A., Páez-Espino, A. D., Durante-Rodríguez, G., Kim, J., Nickel, P. I., Platero, R., and de Lorenzo, V.  
12 (2013) The Standard European Vector Architecture (SEVA): A coherent platform for the analysis  
13 and deployment of complex prokaryotic phenotypes. *Nucleic Acids Res.* 41, D666–75.
- 14 13. Martínez-García, E., and de Lorenzo, V. (2011) Engineering multiple genomic deletions in Gram-  
15 negative bacteria: Analysis of the multi-resistant antibiotic profile of *Pseudomonas putida* KT2440.  
16 *Environ. Microbiol.* 13, 2702–16.
- 17 14. Martínez-García, E., and de Lorenzo, V. (2012) Transposon-based and plasmid-based genetic  
18 tools for editing genomes of gram-negative bacteria. *Methods Mol. Biol.* 813, 267–283.
- 19 15. Martínez-García, E., Aparicio, T., de Lorenzo, V., and Nickel, P. I. (2014) New transposon tools  
20 tailored for metabolic engineering of Gram-negative microbial cell factories. *Front. Bioeng.*  
21 *Biotechnol.* 2, 46.
- 22 16. Aparicio, T., Nyerges, A., Martínez-García, E., and de Lorenzo, V. (2020) High-Efficiency Multi-site  
23 Genomic Editing of *Pseudomonas putida* through Thermoinducible ssDNA Recombineering.  
24 *iScience* 23, 100946.
- 25 17. Martin-Pascual, M., Batianis, C., Bruinsma, L., Asin-Garcia, E., Garcia-Morales, L., Weusthuis, R.  
26 A., van Kranenburg, R., and Martins Dos Santos, V. A. P. (2021) A navigation guide of synthetic  
27 biology tools for *Pseudomonas putida*. *Biotechnol. Adv.* 49, 107732
- 28 18. Mörl, M., Niemer, I., and Schmelzer, C. (1992) New reactions catalyzed by a group II intron  
29 ribozyme with RNA and DNA substrates. *Cell* 70, 803–810.

- 1 19. Lazowska, J., Meunier, B., and Macadre, C. (1994) Homing of a group II intron in yeast  
2 mitochondrial DNA is accompanied by unidirectional co-conversion of upstream-located markers.  
3 *EMBO J.* 13, 4963–72.
- 4 20. Saldanha, R., Chen, B., Wank, H., Matsuura, M., Edwards, J., and Lambowitz, A. M. (1999) RNA  
5 and protein catalysis in group II intron splicing and mobility reactions using purified components.  
6 *Biochemistry* 38, 9069–83.
- 7 21. Matsuura, M., Noah, J. W., and Lambowitz, A. M. (2002) Mechanism of maturase-promoted group  
8 II intron splicing. *EMBO J.* 20, 7259–70.
- 9 22. Lambowitz, A. M., and Zimmerly, S. (2011) Group II introns: Mobile ribozymes that invade DNA.  
10 *Cold Spring Harb. Perspect. Biol.* 3, a003616.
- 11 23. Perutka, J., Wang, W., Goerlitz, D., and Lambowitz, A. M. (2004) Use of Computer-designed Group  
12 II Introns to Disrupt *Escherichia coli* DExH/D-box Protein and DNA Helicase Genes. *J. Mol. Biol.*  
13 336, 421–439.
- 14 24. Heap, J. T., Pennington, O. J., Cartman, S. T., Carter, G. P., and Minton, N. P. (2007) The  
15 ClosTron: A universal gene knock-out system for the genus *Clostridium*. *J. Microbiol. Methods* 70,  
16 452–464.
- 17 25. Akhtar, P., and Khan, S. A. (2012) Two independent replicons can support replication of the anthrax  
18 toxin-encoding plasmid pXO1 of *Bacillus anthracis*. *Plasmid* 67, 111–117.
- 19 26. Frazier, C. L., San Filippo, J., Lambowitz, A. M., and Mills, D. A. (2003) Genetic manipulation of  
20 *Lactococcus lactis* by using targeted group II introns: Generation of stable insertions without  
21 selection. *Appl. Environ. Microbiol.* 69, 1121–8.
- 22 27. Plante, I., and Cousineau, B. (2006) Restriction for gene insertion within the *Lactococcus lactis*  
23 LI.LtrB group II intron. *RNA* 12, 1980–92.
- 24 28. Rawsthorne, H., Turner, K. N., and Mills, D. A. (2006) Multicopy integration of heterologous genes,  
25 using the lactococcal group II intron targeted to bacterial insertion sequences. *Appl. Environ.*  
26 *Microbiol.* 72, 6088–93.
- 27 29. Garcíá-Rodríguez, F. M., Hernández-Gutiérrez, T., Díaz-Prado, V., and Toro, N. (2014) Use of the  
28 computer-retargeted group II intron Rmlnt1 of *Sinorhizobium meliloti* for gene targeting. *RNA Biol.*  
29 11, 391–401.

- 1 30. Velázquez, E., de Lorenzo, V., and Al-Ramahi, Y. (2019) Recombination-Independent Genome  
2 Editing through CRISPR/Cas9-Enhanced TargeTron Delivery. *ACS Synth. Biol.* 8, 2186–2193.
- 3 31. Benedetti, I., Nickel, P. I., and de Lorenzo, V. (2016) Data on the standardization of a  
4 cyclohexanone-responsive expression system for Gram-negative bacteria. *Data Br.* 6, 738–744.
- 5 32. Aparicio, T., de Lorenzo, V., and Martínez-García, E. (2018) CRISPR/Cas9-Based  
6 Counterselection Boosts Recombineering Efficiency in *Pseudomonas putida*. *Biotechnol. J.* 13,  
7 1700161.
- 8 33. Cousineau, B., Smith, D., Lawrence-Cavanagh, S., Mueller, J. E., Yang, J., Mills, D., Manias, D.,  
9 Dunny, G., Lambowitz, A. M., and Belfort, M. (1998) Retrohoming of a bacterial group II intron:  
10 Mobility via complete reverse splicing, independent of homologous DNA recombination. *Cell* 94,  
11 451–462.
- 12 34. Tellechea-Luzardo, J., Winterhalter, C., Widera, P., Kozyra, J., De Lorenzo, V., and Krasnogor, N.  
13 (2020) Linking Engineered Cells to Their Digital Twins: A Version Control System for Strain  
14 Engineering. *ACS Synth. Biol.* 9, 536–545.
- 15 35. Yao, J., Zhong, J., Fang, Y., Geisinger, E., Novick, R. P., and Lambowitz, A. M. (2006) Use of  
16 targetrons to disrupt essential and nonessential genes in *Staphylococcus aureus* reveals  
17 temperature sensitivity of LI.LtrB group II intron splicing. *RNA* 12, 1271–81.
- 18 36. Karberg, M., Guo, H., Zhong, J., Coon, R., Perutka, J., and Lambowitz, A. M. (2001) Group II introns  
19 as controllable gene targeting vectors for genetic manipulation of bacteria. *Nat. Biotechnol.* 19,  
20 1162–67.
- 21 37. Yao, J., and Lambowitz, A. M. (2007) Gene targeting in gram-negative bacteria by use of a mobile  
22 group II intron (“targetron”) expressed from a broad-host-range vector. *Appl. Environ. Microbiol.* 73,  
23 2735–43.
- 24 38. Martínez-García, E., Aparicio, T., Goñi-Moreno, A., Fraile, S., and De Lorenzo, V. (2015) SEVA  
25 2.0: An update of the Standard European Vector Architecture for de-/re-construction of bacterial  
26 functionalities. *Nucleic Acids Res.* 43, D1183-9.
- 27 39. Martínez-García, E., Goñi-Moreno, A., Bartley, B., McLaughlin, J., Sánchez-Sampedro, L., Pascual  
28 Del Pozo, H., Prieto Hernández, C., Marletta, A. S., De Lucrezia, D., Sánchez-Fernández, G.,  
29 Fraile, S., and de Lorenzo, V. (2020) SEVA 3.0: An update of the Standard European Vector

- 1 Architecture for enabling portability of genetic constructs among diverse bacterial hosts. *Nucleic*  
2 *Acids Res.* 48, D1164–D1170.
- 3 40. Zhong, J., Karberg, M., and Lambowitz, A. M. (2003) Targeted and random bacterial gene  
4 disruption using a group II intron (targetron) vector containing a retrotransposition-activated  
5 selectable marker. *Nucleic Acids Res.* 31, 1656–64.
- 6 41. Studier, F. W., and Moffatt, B. A. (1986) Use of bacteriophage T7 RNA polymerase to direct  
7 selective high-level expression of cloned genes. *J. Mol. Biol.* 189, 113–130.
- 8 42. Flynn, P. J., and Reece, R. J. (1999) Activation of Transcription by Metabolic Intermediates of the  
9 Pyrimidine Biosynthetic Pathway. *Mol. Cell. Biol.* 19, 882–888.
- 10 43. Boeke, J. D., La Croute, F., and Fink, G. R. (1984) A positive selection for mutants lacking orotidine-  
11 5'-phosphate decarboxylase activity in yeast: 5-fluoro-orotic acid resistance. *Mol. Gen. Genet.* 197,  
12 345–346.
- 13 44. Galvão, T. C., and de Lorenzo, V. (2005) Adaptation of the yeast URA3 selection system to gram-  
14 negative bacteria and generation of a  $\Delta betCDE$  *Pseudomonas putida* strain. *Appl. Environ.*  
15 *Microbiol.* 71, 883–892.
- 16 45. Cousineau, B., Lawrence, S., Smith, D., and Belfort, M. (2000) Retrotransposition of a bacterial  
17 group II intron. *Nature* 404, 1018–21.
- 18 46. Golomb, M., and Chamberlin, M. (1974) Characterization of T7 specific ribonucleic acid  
19 polymerase. IV. Resolution of the major in vitro transcripts by gel electrophoresis. *J. Biol. Chem.*  
20 249, 2858–63.
- 21 47. Chamberlin, M., and Ryan, T. (1982) 4 Bacteriophage DNA-Dependent RNA Polymerases.  
22 *Enzymes* 15, 87–108.
- 23 48. Benedetti, I., de Lorenzo, V., and Nikel, P. I. (2016) Genetic programming of catalytic  
24 *Pseudomonas putida* biofilms for boosting biodegradation of haloalkanes. *Metab. Eng.* 33, 109–  
25 118.
- 26 49. Martínez-Abarca, F., García-Rodríguez, F. M., and Toro, N. (2000) Homing of a bacterial group II  
27 intron with an intron-encoded protein lacking a recognizable endonuclease domain. *Mol. Microbiol.*  
28 35, 1405–12.

- 1 50. Frazier, C. L., San Filippo, J., Lambowitz, A. M., and Mills, D. A. (2003) Genetic manipulation of  
2 *Lactococcus lactis* by using targeted group II introns: Generation of stable insertions without  
3 selection. *Appl. Environ. Microbiol.* 69, 1121–1128.
- 4 51. Jiang, W., Bikard, D., Cox, D., Zhang, F., and Marraffini, L. A. (2013) RNA-guided editing of  
5 bacterial genomes using CRISPR-Cas systems. *Nat. Biotechnol.* 31, 233–239.
- 6 52. Pyne, M. E., Moo-Young, M., Chung, D. A., and Chou, C. P. (2015) Coupling the CRISPR/Cas9  
7 system with lambda red recombineering enables simplified chromosomal gene replacement in  
8 *Escherichia coli*. *Appl. Environ. Microbiol.* 81, 5103–14.
- 9 53. Barrangou, R., Fremaux, C., Deveau, H., Richards, M., Boyaval, P., Moineau, S., Romero, D. A.,  
10 and Horvath, P. (2007) CRISPR provides acquired resistance against viruses in prokaryotes.  
11 *Science* 315, 1709–12.
- 12 54. Tellechea-Luzardo, J., Hobbs, L., Velázquez, E., Pelechova, L., Woods, S., de Lorenzo, V., and  
13 Krasnogor, N. (2021) Versioning Biological Cells for Trustworthy Cell Engineering. *bioRxiv*  
14 2021.04.23.441106.
- 15
- 16
- 17
